# Supplementary material for: Production of a fluorescence resonance energy transfer (FRET) biosensor membrane for microRNA detection
Source: Royal Society of Chemistry journal article supplement (doi:10.1039/c7tb01399j), 2017-01-01
Supplement: c7tb01399j1.pdf [file c7tb01399j1.pdf]

# Production of a Fluorescence Resonance Energy Transfer (FRET) Biosensor Membrane for MicroRNA Detection

Yike Fu<sup>a</sup>, Tong Chen<sup>a</sup>, Gang Wang<sup>a</sup>, Tongxu Gu<sup>a</sup>, Congkun Xie<sup>a</sup>, Jie Huang<sup>b</sup>, Xiang Li<sup>a\*</sup>, Serena Best<sup>c</sup>, Gaorong Han<sup>a\*</sup>

<sup>a</sup> State Key Laboratory of Silicon Materials, School of Materials Science and Engineering, Zhejiang University, Hangzhou, Zhejiang 310027, P. R. China.

<sup>b</sup> Department of Mechanical Engineering, University College London, London WC1E 7JE, UK.

<sup>c</sup> Department of Materials Science and Metallurgy, University of Cambridge, Cambridge CB3 0FS, UK.

\* E-mail: [xiang.li@zju.edu.cn](mailto:xiang.li@zju.edu.cn); [hqr@zju.edu.cn](mailto:hqr@zju.edu.cn)

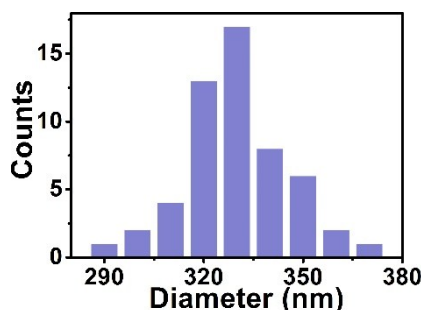

Figure S1 Diameter distribution of  $\text{CaF}_2\text{:Yb,Ho}$  nanoparticles processed hydrothermally at 180 °C for 24 h.

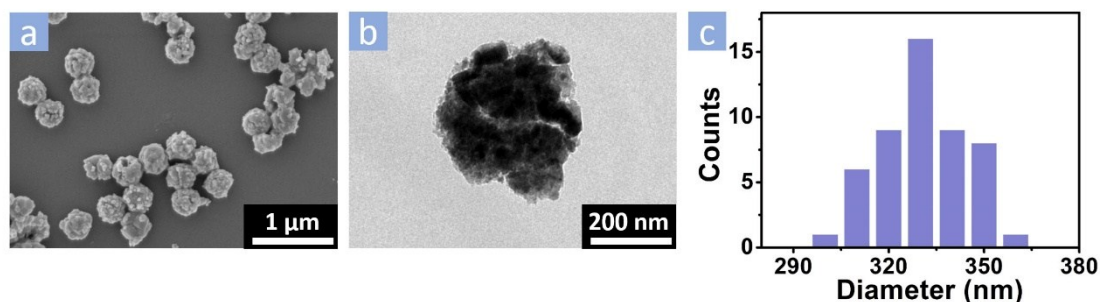

Figure S2 (a) SEM, (b) TEM and (c) diameter distribution of  $\text{CaF}_2\text{:Yb,Ho}$  nanoparticles calcined at 700 °C for 4 h.

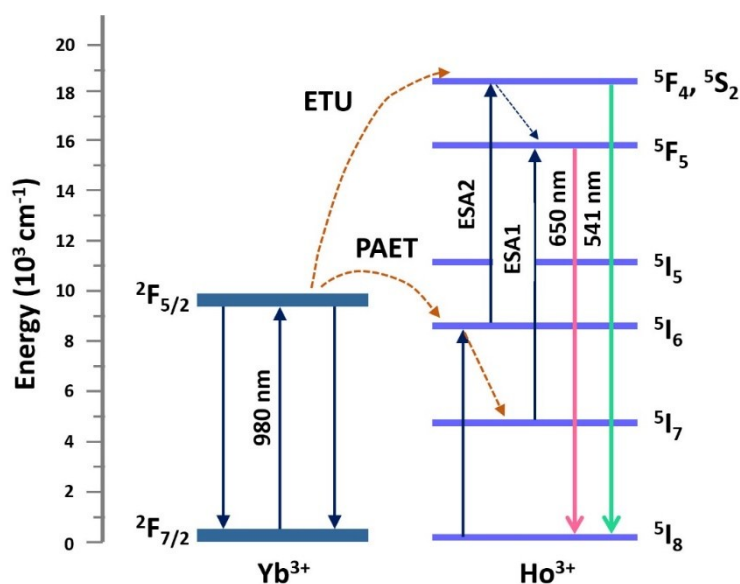

Figure S3 Simplified energy level scheme of  $\text{Yb}^{3+}/\text{Ho}^{3+}$  ions with mechanisms of energy transfer under excitation of 980 nm NIR. After ground state absorption of  $\text{Yb}^{3+}$  ion, the  $\text{Ho}^{3+}$  at  $^5\text{I}_6$  level ion is populated in result of phonon-assisted energy transfer (PAET). Short lifetime of this multiplet leads to rapid nonradiative relaxation to metastable  $^5\text{I}_7$  level. Subsequently, the excited ions gathered on this level absorb energy from pump radiation and populated to  $^5\text{F}_5$  level ( $^5\text{I}_7$ - $^5\text{F}_5$  transition) through excited state absorption (ESA1) process. In the next step, the  $^5\text{F}_4(^5\text{S}_2)$  was populated in consequence of the energy transfer with upconversion (ETU) from the excited  $\text{Yb}^{3+}$  ion and with second excited state absorption (ESA2). Finally, the green and red emissions can be generated at the  $^5\text{F}_4/^5\text{S}_2$  state and  $^5\text{F}_5$  state by radiative decays to the ground  $^5\text{I}_8$  state with the wavelengths of 541 nm and 650 nm, respectively <sup>1,2</sup>.

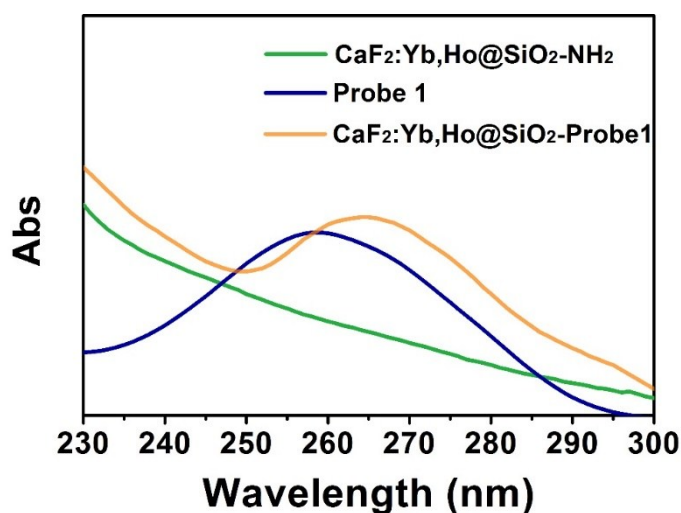

Figure S4 UV-vis absorption of  $\text{CaF}_2:\text{Yb,Ho@SiO}_2\text{-NH}_2$ , Probe 1 and  $\text{CaF}_2:\text{Yb,Ho@SiO}_2\text{-Probe1}$  conjugation.

## References

1. C. Guanying, L. Haichun, S. Gabriel, L. Huijuan and Z. Zhiguo, *Nanotechnology*, 2009, **20**, 385704.
2. J. Zmojda, M. Kochanowicz, P. Miluski, J. Dorosz, J. Pisarska, W. A. Pisarski and D. Dorosz, *J. Lumin.*, 2016, **170**, 795-800.
